# Supplementary material for: Clinical Relevance of Parafoveal Intercapillary Spaces and Foveal Avascular Zone in Diabetic Retinopathy Without Macular Edema
Source: PubMed Central journal article supplement — Invest Ophthalmol Vis Sci. 2022 Nov 2;63(12):4. doi: 10.1167/iovs.63.12.4 (PMC9639681; doi:10.1167/iovs.63.12.4), 2022-11-02
Supplement: iovs-63-12-4_s001.pdf [file iovs-63-12-4_s001.pdf]

**Supplementary Table S1. The association between logMAR and quantitative parameters in the FAZ and intercapillary spaces in 110 eyes with DR.**

|                       | Association with logMAR |
|-----------------------|-------------------------|
| FAZ                   |                         |
| Area                  | $\rho=0.252, P=0.010$   |
| Minimum diameter      | $\rho=0.232, P=0.019$   |
| Maximum diameter      | $\rho=0.247, P=0.012$   |
| Perimeter             | $\rho=0.251, P=0.010$   |
| Intercapillary spaces |                         |
| Mean area             | $\rho=0.301, P=0.002$   |
| Mean minimum diameter | $\rho=0.253, P=0.011$   |
| Mean maximum diameter | $\rho=0.275, P=0.006$   |
| Mean perimeter        | $\rho=0.243, P=0.014$   |

**Supplementary Figure S1. The relationship between the counts of intercapillary spaces and the typical perfusion indices in the superficial layer of the en-face OCTA images.**

The significant associations of the total counts of intercapillary spaces with the vessel density (A), vessel length density (B), and fractal dimension (C) within central 2 mm.

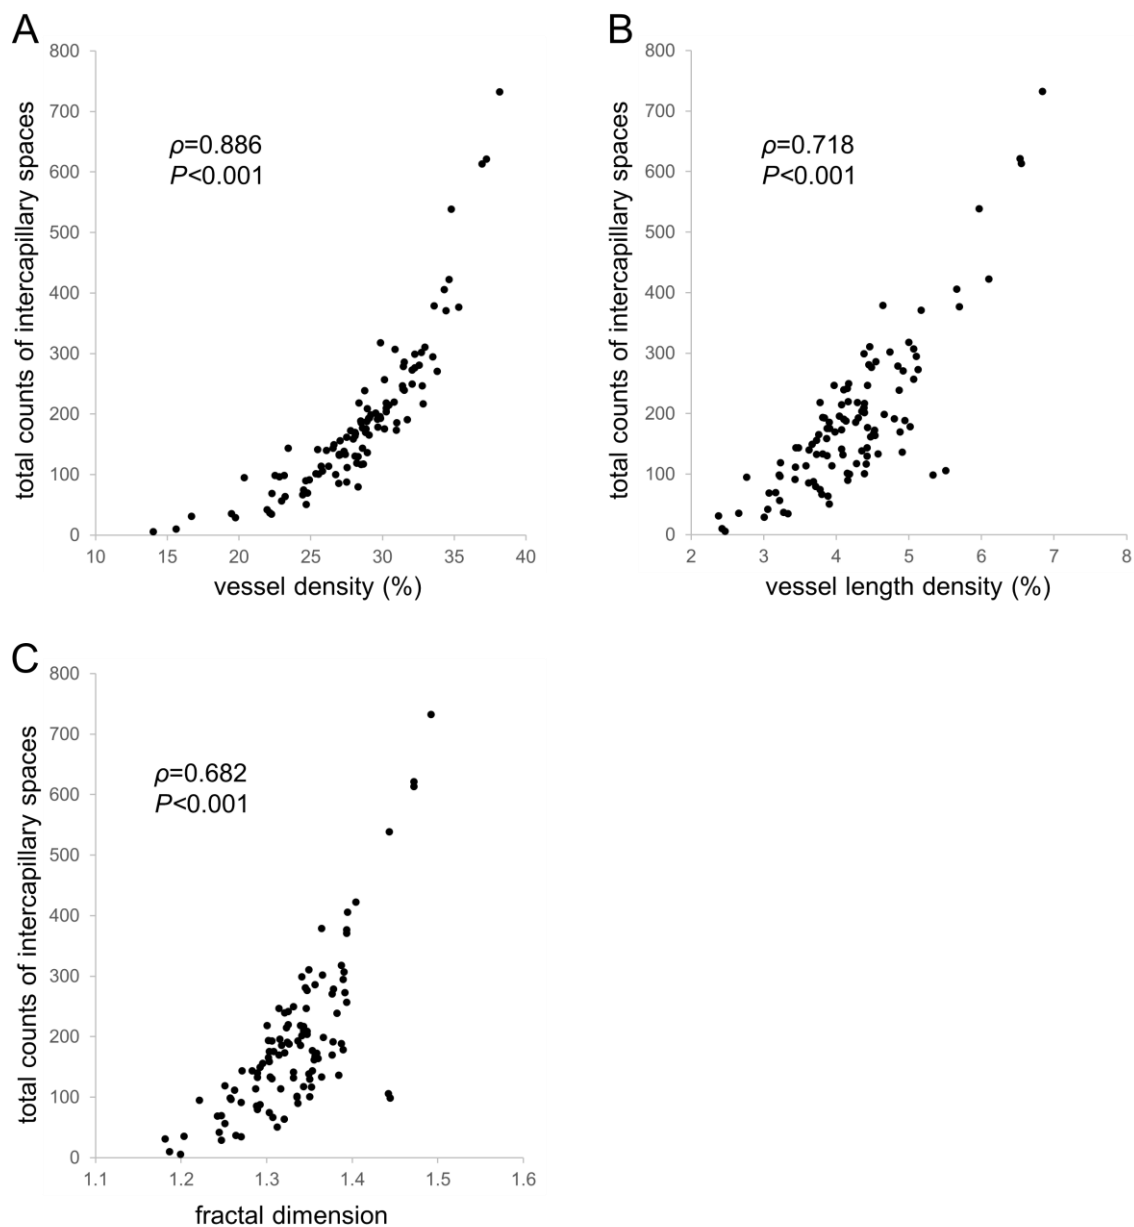

**Supplementary Figure S2. The relationship between logMAR and the typical perfusion indices in the superficial layer of the en-face OCTA images.**

The modest associations of logMAR with the vessel density (A), vessel length density (B), and fractal dimension (C) within central 2 mm.

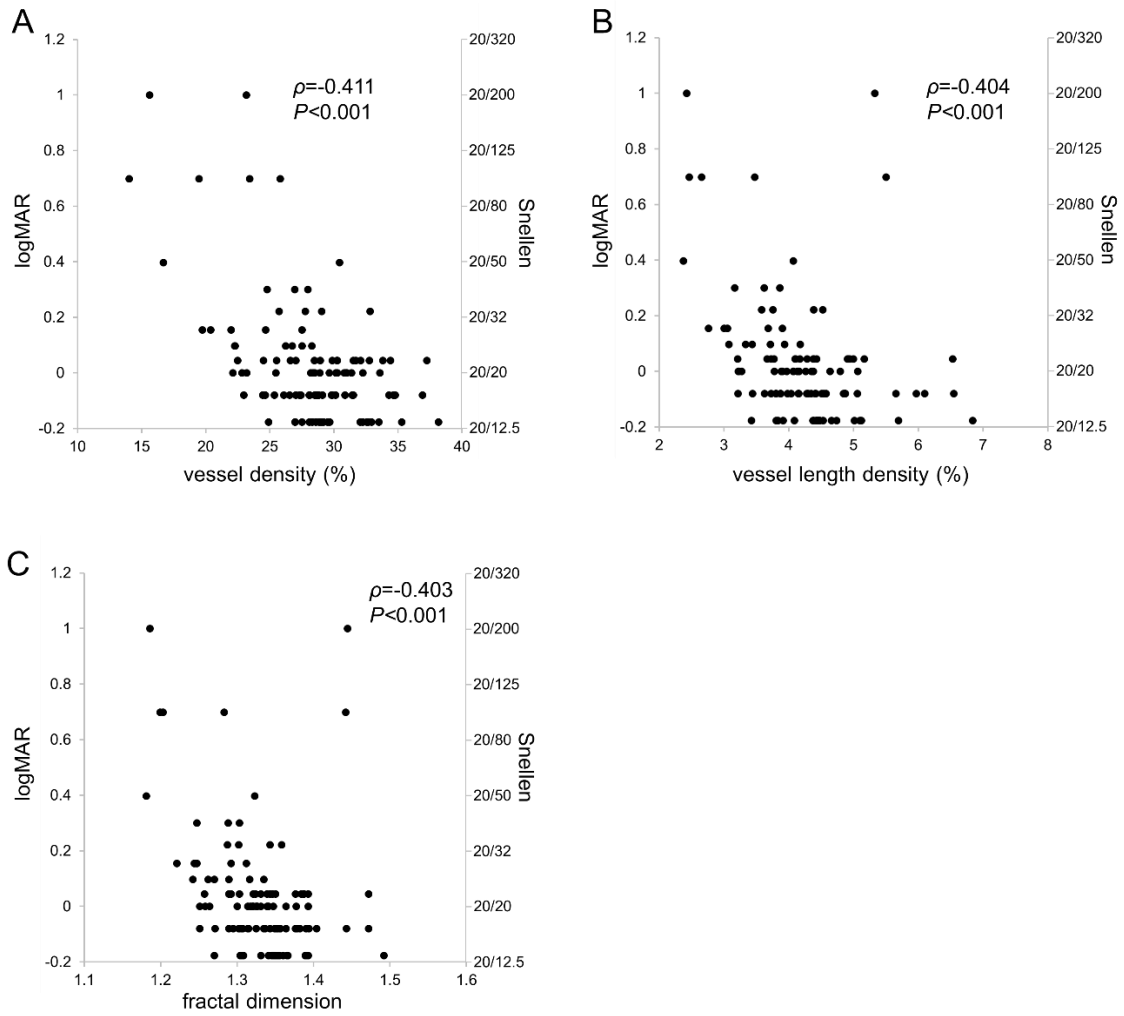

**Supplementary Table S2. Association between logMAR and the number of intercapillary spaces with each size threshold.**

| Size threshold        | Number of intercapillary spaces | Association with logMAR |
|-----------------------|---------------------------------|-------------------------|
| <0.01 mm <sup>2</sup> | 136 (89-207)                    | $\rho=-0.408, P<0.001$  |
| <0.02 mm <sup>2</sup> | 154 (96-221)                    | $\rho=-0.413, P<0.001$  |
| <0.03 mm <sup>2</sup> | 162 (98-229)                    | $\rho=-0.415, P<0.001$  |
| <0.04 mm <sup>2</sup> | 167 (100-233)                   | $\rho=-0.417, P<0.001$  |
| <0.05 mm <sup>2</sup> | 168 (100-233)                   | $\rho=-0.416, P<0.001$  |

**Supplementary Figure S3. Pseudocolor map of the correlation between logMAR and the number of intercapillary spaces in each sector which was divided by different patterns of the rings.**

(A) The pseudocolor map in octant sectors of four rings (ring 1 [0.2 to 0.4 mm from the center], ring 2 [0.4 to 0.6 mm], ring 3 [0.6 to 0.8 mm], and ring 4 [0.8 to 1 mm]). (B) The map in octant sectors of three rings (ring 1 [0.25 to 0.5 mm from the center], ring 2 [0.5 to 0.75 mm], ring 3 [0.75 to 1 mm]).

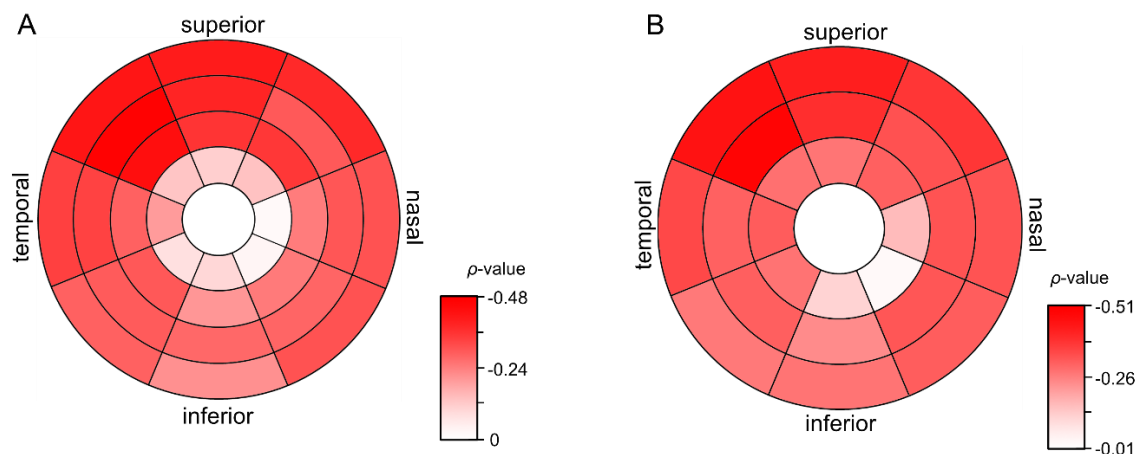

**Supplementary Table S3. Multivariate regression analyses to investigate the factors associated with logMAR in 82 eyes of the nonperfusion group.**

| Variables                                                                | Univariate             |                      |                 | Multivariate           |                      |                 |
|--------------------------------------------------------------------------|------------------------|----------------------|-----------------|------------------------|----------------------|-----------------|
|                                                                          | Unstandardized $\beta$ | Standardized $\beta$ | <i>P</i> -value | Unstandardized $\beta$ | Standardized $\beta$ | <i>P</i> -value |
| Age (years)                                                              | 0.002                  | 0.089                | 0.427           | -                      | -                    | -               |
| Gender (male)                                                            | -0.009                 | -0.016               | 0.887           | -                      | -                    | -               |
| Hemoglobin A1c (%)                                                       | -0.011                 | -0.073               | 0.538           | -                      | -                    | -               |
| Duration of diabetes (years)                                             | -0.004                 | -0.184               | 0.132           | -                      | -                    | -               |
| Systemic hypertension                                                    | -0.014                 | -0.027               | 0.807           | -                      | -                    | -               |
| Dyslipidemia                                                             | -0.109                 | -0.218               | 0.050           | -0.056                 | -0.145               | 0.135           |
| Pseudophakia                                                             | 0.059                  | 0.119                | 0.287           | -                      | -                    | -               |
| PDR                                                                      | -0.031                 | -0.061               | 0.589           | -                      | -                    | -               |
| FAZ area (mm <sup>2</sup> )                                              | 0.169                  | 0.370                | 0.001           | 0.067                  | 0.148                | 0.189           |
| Number of intercapillary spaces in the <i>highly significant sectors</i> | -0.006                 | -0.535               | <0.001          | -0.005                 | -0.443               | <0.001          |
| Prior panretinal photocoagulation                                        | 0.137                  | 0.274                | 0.013           | 0.029                  | 0.075                | 0.450           |

**Supplementary Table S4. Characteristics of eyes of two subgroups in 82 eyes of the nonperfusion group.**

|                                               | Severe subgroup<br>(34 eyes) | Mild subgroup<br>(48 eyes) | <i>P</i> -value |
|-----------------------------------------------|------------------------------|----------------------------|-----------------|
| Age (years)                                   | 56 (48-69)                   | 64 (51-73)                 | 0.230           |
| Gender (male/female)                          | 26/8                         | 35/13                      | 0.801           |
| Hemoglobin A1c (%)                            | 7.8 (7.2-8.5)                | 7.4 (6.4-8.3)              | 0.095           |
| Duration of diabetes (years)                  | 14 (9-22)                    | 17 (10-21)                 | 0.994           |
| Systemic hypertension                         | 19                           | 30                         | 0.649           |
| Dyslipidemia                                  | 14                           | 26                         | 0.270           |
| LogMAR                                        | 0.097 (0.000–0.205)          | -0.079 (-0.103–0.046)      | 0.001           |
| Phakia/pseudophakia                           | 16/18                        | 26/22                      | 0.654           |
| International DR severity scale               |                              |                            | 0.312           |
| Mild NPDR                                     | 1                            | 3                          |                 |
| Moderate NPDR                                 | 8                            | 18                         |                 |
| Severe NPDR                                   | 3                            | 6                          |                 |
| PDR                                           | 22                           | 21                         |                 |
| FAZ                                           |                              |                            |                 |
| Area (10 <sup>-3</sup> mm <sup>2</sup> )      | 1187 (831-1540)              | 705 (523-864)              | <0.001          |
| Minimum diameter (10 <sup>-1</sup> mm)        | 14.88 (12.11-16.48)          | 10.68 (8.82-12.14)         | <0.001          |
| Maximum diameter (10 <sup>-1</sup> mm)        | 19.42 (16.70-19.92)          | 15.46 (13.65-16.59)        | <0.001          |
| Perimeter (10 <sup>-1</sup> mm)               | 229.0 (173.5-275.3)          | 143.8 (104.5-199.9)        | <0.001          |
| Intercapillary spaces                         |                              |                            |                 |
| Total counts                                  | 87 (53-101)                  | 175 (144-193)              | <0.001          |
| Mean area (10 <sup>-3</sup> mm <sup>2</sup> ) | 9.31 (7.86-13.54)            | 6.13 (5.49-7.13)           | <0.001          |
| Mean minimum diameter (10 <sup>-1</sup> mm)   | 0.685 (0.615-0.784)          | 0.591 (0.544-0.626)        | <0.001          |
| Mean maximum diameter (10 <sup>-1</sup> mm)   | 1.394 (1.257-1.663)          | 1.150 (1.032-1.225)        | <0.001          |
| Mean perimeter (10 <sup>-1</sup> mm)          | 5.08 (4.31-6.04)             | 3.84 (3.52-4.63)           | <0.001          |
| Prior panretinal photocoagulation             | 23                           | 19                         | 0.015           |
